# Supplementary material for: Drosophila macrophages switch to aerobic glycolysis to mount effective antibacterial defense
Source: eLife. 2019 Oct 14;8:e50414. doi: 10.7554/eLife.50414 (PMC6867711; doi:10.7554/eLife.50414)
Supplement: Figure 2—figure supplement 1—source data 1. [file elife-50414-fig2-figsupp1-data1.xlsx]

## Sheet: Sheet1
	Figure 2 - Supplementary figure 1
	Fig.2 Fig.S1 A - Expression of HexA
		Hml>GFP PBS																											Hml>GFP S.p.
	24 hpi	1.25895	0.934471	0.987753	0.603833	0.51843	0.536713	1.31241	0.928016	0.877957	0.791259	0.587321	0.620809	0.708197	0.608033	0.629476	0.947516	0.669995	0.633854	0.693622	0.514849	0.544205	0.679348	0.583265	0.603833	1.60461	1.13463	1.07343	1.57159	1.44616	1.11901	2.69862	2.39865	2.14685	1.68439	1.81784	1.67275	1.63833	1.50757	1.16653	1.51805	1.34931	1.20767	1.54995	1.67275	1.53924	1.56073	1.43617	1.11128
	120 hpi	0.738271	0.738271	0.669995	0.785794	0.836375	0.743406	0.960743	0.954107	0.813504	1.27652	1.27652	1.15847	1.34931	1.43617	1.27652	0.967425	0.960743	0.819163	1.29435	1.29435	1.17464	0.807885	0.859889	0.764306	0.625127	0.620809	0.529324	0.608033	0.480371	0.571261	0.608033	0.688831	0.567315	0.616521	0.59552	0.51843	0.703305	0.55564	0.660771	0.647173	0.733171	0.603833	0.567315	0.54799	0.477053	0.656207	0.51843	0.616521
	Fig.2 Fig.S1 B - Expression of Pgi
		Hml>GFP PBS																											Hml>GFP S.p.
	24 hpi	1.20117	1.11299	1.20117	0.592318	0.56819	0.617471	1.08256	1.20953	1.06028	0.754946	0.699524	0.754946	0.694692	0.666393	0.724192	0.781569	0.873237	0.765484	0.66179	0.613206	0.66179	0.666393	0.639247	0.694692	1.32358	1.47882	1.29634	1.85889	1.91115	1.88484	3.2817	3.21417	3.08323	2.28857	2.04833	2.25706	1.93783	1.99231	1.96488	1.84605	1.80806	1.73441	2.10591	1.88484	2.07692	1.84605	1.89795	1.87182
	120 hpi	0.803542	0.729229	0.855266	0.849358	0.87931	0.826132	0.820426	0.849358	0.734301	1.38938	1.26089	1.47882	1.45846	1.50989	1.41858	0.826132	0.855266	0.739409	1.40878	1.27849	1.49946	0.873237	0.904031	0.849358	0.533827	0.552652	0.477789	0.781569	0.666393	0.626091	0.803542	0.739409	0.675695	0.689893	0.787005	0.666393	0.904031	0.770809	0.724192	0.855266	0.787005	0.71919	0.634831	0.724192	0.613206	0.843491	0.71919	0.675695
	Fig.2 Fig.S1 C - Expression of Pfk
		Hml>GFP PBS																											Hml>GFP S.p.
	24 hpi	1.38298	1.02653	1.07757	0.649669	0.531366	0.553931	1.10021	1.12333	1.44171	0.869211	0.645182	0.677258	0.761955	0.623205	0.649669	0.794312	0.811002	1.04086	0.761955	0.56557	0.593688	0.730916	0.597818	0.623205	1.34516	1.37342	1.76269	1.79973	1.99692	1.08506	2.52762	2.05306	3.00586	2.32588	2.9851	2.9851	1.87615	2.08172	1.13114	1.42186	1.15491	1.69088	2.14025	2.74685	2.74685	1.7873	1.98313	1.07757
	120 hpi	0.857244	0.8054	0.6189	0.863207	0.715874	1.14693	1.42186	1.03367	0.353009	1.48224	1.3926	1.07012	1.48224	1.22925	1.96943	1.43175	1.04086	0.355465	1.50293	1.41204	1.08506	0.887475	0.736	1.17918	0.925162	0.67258	0.229693	1.14693	0.799837	0.783377	1.0481	0.767255	1.08506	0.746274	0.730916	0.822323	1.32664	0.925162	0.906122	1.11557	0.816643	1.15491	0.686712	0.67258	0.756692	1.2378	0.863207	0.845442
	Fig.2 Fig.S1 D - Expression of Tpi
		Hml>GFP PBS																											Hml>GFP S.p.
	24 hpi	1.11471	0.983957	1.08423	0.569066	0.545884	0.585064	1.2283	1.20303	1.01162	0.700602	0.618423	0.681444	0.66742	0.640232	0.686184	0.886791	0.868541	0.730353	0.614152	0.542113	0.597358	0.640232	0.614152	0.658231	1.50177	1.47087	1.23685	2.15347	2.05148	2.24492	3.6217	2.57874	3.15287	2.50822	2.68825	2.86129	2.24492	2.1386	2.34026	2.03731	1.45062	1.77358	2.30804	2.47369	2.63293	2.1386	2.03731	2.22942
	120 hpi	0.766664	0.730353	0.7457	0.761368	0.766664	0.725309	1.08423	1.02574	0.899171	1.32562	1.26283	1.28937	1.30737	1.31646	1.24545	1.09177	1.03288	0.905425	1.34412	1.28046	1.30737	0.782773	0.788218	0.7457	0.705475	0.66742	0.585064	0.911722	0.756109	0.750886	0.756109	0.725309	0.715323	0.793701	0.735433	0.653685	1.05458	0.874583	0.868541	0.80478	0.771997	0.761368	0.730353	0.676737	0.601513	0.983957	0.816014	0.810378
	Fig.2 Fig.S1 E - Expression of Gapdh1
		Hml>GFP PBS																											Hml>GFP S.p.
	24 hpi	1.16743	1.00928	1.04488	0.556068	0.544624	0.56383	1.30435	1.47768	1.19196	0.733736	0.634342	0.656712	0.652176	0.638754	0.66128	0.941696	1.06683	0.860551	0.643197	0.556068	0.575678	0.625609	0.612734	0.634342	1.59475	1.80667	1.45734	1.68568	1.7211	1.74513	3.34808	3.10229	2.95536	3.03844	2.77663	2.91467	1.75727	1.79419	1.81924	1.88339	1.74513	1.66248	2.79594	2.55502	2.68205	1.67404	1.70921	1.73307
	120 hpi	0.675175	0.73884	0.780967	0.723635	0.723635	0.713672	1.27751	1.18372	1.01631	1.16743	1.27751	1.35035	1.24257	1.24257	1.22547	1.28639	1.19196	1.02337	1.18372	1.29534	1.3692	0.743979	0.743979	0.733736	0.831238	0.770215	0.66128	0.848704	0.780967	0.713672	0.884745	0.797377	0.775572	0.915945	0.848704	0.797377	0.981686	0.903335	0.825496	0.941696	0.848704	0.825496	0.842842	0.780967	0.733736	0.915945	0.842842	0.770215
	Fig.2 Fig.S1 F - Expression of Enolase
		Hml>GFP PBS																											Hml>GFP S.p.
	24 hpi	1.36709	1.22358	1.28442	0.633366	0.646674	0.697909	1.21513	1.25798	1.1819	0.859227	0.76903	0.807263	0.742834	0.758442	0.818532	0.877281	0.908218	0.853292	0.753203	0.674136	0.707652	0.712574	0.727546	0.785189	1.48567	1.53806	1.44504	1.73041	1.74244	1.92001	3.94797	3.81349	3.58286	1.5813	1.51688	2.44717	1.80389	1.81644	2.00154	2.22085	2.1452	2.01546	1.45509	1.39582	2.25185	1.71845	1.73041	1.90674
	120 hpi	0.901945	0.895715	0.841544	0.883383	0.920897	0.841544	0.980175	0.960003	0.801687	1.55953	1.54876	1.45509	1.51688	1.5813	1.44504	0.986993	0.966681	0.807263	1.5813	1.57038	1.47541	0.908218	0.946787	0.865203	0.637771	0.624646	0.521634	0.616046	0.547568	0.496929	0.582815	0.570821	0.54003	0.518031	0.525263	0.48334	0.712574	0.633366	0.574792	0.620331	0.607565	0.574792	0.476686	0.48334	0.444764	0.664855	0.590951	0.5363
	Fig.2 Fig.S1 G - Expression of Cis
		Hml>GFP PBS																											Hml>GFP S.p.
	24 hpi	1.47882	1.26966	1.44838	0.617471	0.596438	0.66179	0.968917	1.06765	0.87931	0.929447	0.797991	0.910319	0.724192	0.699524	0.77617	0.699524	0.770809	0.634831	0.814759	0.699524	0.797991	0.694692	0.671028	0.744552	1.18464	1.30536	1.07508	0.685128	0.71919	0.564265	2.00617	1.91115	2.04833	0.867205	0.781569	0.781569	0.714222	0.749731	0.588227	1.12853	1.07508	1.15224	0.797991	0.71919	0.71919	0.680395	0.714222	0.560367
	120 hpi	1.03846	1.08256	1.06765	0.916651	0.814759	0.855266	1.54162	1.37026	1.26089	1.79557	1.87182	1.84605	1.57401	1.39905	1.4686	1.55234	1.37979	1.26966	1.82064	1.89795	1.87182	0.942422	0.837665	0.87931	1.00309	0.891585	0.820426	0.494638	0.515643	0.393502	0.452016	0.64817	0.617471	0.362096	0.512081	0.306603	0.572142	0.596438	0.45516	0.481112	0.689893	0.657218	0.333196	0.471211	0.282132	0.533827	0.556496	0.424679
	Fig.2 Fig.S1 H - Expression of Scsa1
		Hml>GFP PBS																											Hml>GFP S.p.
	24 hpi	1.35243	1.06848	1.21046	0.60523	0.617947	0.719744	1.60832	1.83471	1.52157	0.850012	0.671545	0.760782	0.709835	0.72475	0.844141	1.16115	1.3246	1.09852	0.745126	0.58868	0.666906	0.680919	0.695227	0.809754	1.9664	2.2432	1.86033	0.700062	0.58868	0.613679	1.49025	1.41967	1.60832	2.21231	1.53215	1.74782	0.729791	0.613679	0.639739	0.83831	0.798606	0.904728	2.03574	1.40986	1.60832	0.695227	0.584614	0.60944
	120 hpi	0.873909	0.886109	0.911021	0.855925	0.844141	0.657725	1.39045	1.1216	0.943148	1.51105	1.53215	1.57522	1.46973	1.4495	1.1294	1.40013	1.1294	0.949708	1.53215	1.55354	1.59721	0.879988	0.867873	0.676216	0.904728	0.729791	0.613679	0.481483	0.375154	0.352466	0.367434	0.347613	0.33115	0.549258	0.465082	0.33115	0.556925	0.433936	0.407693	0.391085	0.369989	0.352466	0.50542	0.427962	0.30472	0.51963	0.404877	0.380391
	Fig.2 Fig.S1 I - Expression of CG10219
		Hml>GFP PBS																											Hml>GFP S.p.
	24 hpi	0.948246	1.00928	1.11214	0.387786	0.567752	0.487452	1.2086	1.54043	1.2086	0.595979	0.634342	0.698985	0.454809	0.66588	0.571701	0.872564	1.11214	0.872564	0.522439	0.556068	0.612734	0.436282	0.638754	0.548412	1.47768	1.88339	1.47768	0.439317	0.302149	0.66128	1.04488	0.872564	1.03766	2.87454	1.45734	1.70921	0.457973	0.31498	0.689362	0.587774	0.490843	0.583714	2.64512	1.34102	1.5728	0.436282	0.300062	0.656712
	120 hpi	0.83702	0.831238	0.643197	0.884745	0.621288	0.643197	0.878633	0.884745	1.26868	1.44727	1.43727	1.11214	1.51922	1.06683	1.10445	0.884745	0.890899	1.27751	1.46747	1.45734	1.12766	0.909618	0.638754	0.66128	0.571701	0.575678	0.825496	0.474123	0.679871	0.366868	0.474123	0.326088	0.454809	0.287839	0.310644	0.427304	0.548412	0.786399	0.424352	0.504642	0.347078	0.484085	0.264866	0.285851	0.393199	0.511687	0.733736	0.395934
[truncated: 6 more columns]
