# Supplementary material for: Drosophila macrophages switch to aerobic glycolysis to mount effective antibacterial defense
Source: eLife. 2019 Oct 14;8:e50414. doi: 10.7554/eLife.50414 (PMC6867711; doi:10.7554/eLife.50414)
Supplement: Figure 2—source data 1. [file elife-50414-fig2-data1.xlsx]

## Sheet: Sheet1
	Figure 2 - numerical data
	Fig.2 D - Pgi activity
		HmlGal4 GFP Buff injected						HmlGal4 GFP Sp infected
	24 hpi	0.208	0.25	0.458	0.083	0.167	0.333	2.3	2.4188	2.525	2.125	2.4625	2.3438
	120 hpi	0.5	0.208	0.208	0.833	0.2958	0.083	0.583	0.5	1	0.458	0.583	0.417
	Fig.2 E - LDH activity
		HmlGal4 GFP Buff injected						HmlGal4 GFP Sp infected
	24 hpi	11.3288	16.3823	35.0109	9.64427	11.1306	34.2182	52.9459	40.3617	78.7089	104.175	55.6213	57.4049
	120 hpi	33.1282	7.66251	6.77071	29.6601	67.9082	15.3914	42.3434	51.0632	53.1441	50.0723	43.0371	74.4481
	Fig.2 F - NADH level
		HmlGal4 GFP Buff						HmlGal4 GFP Sp
	24 hpi	1.76816	1.79303	1.84279	1.75572	1.76816	1.73085	10.7794	13.1861	12.104	12.3465	12.8503	13.0555
	120 hpi	1.7806	1.83035	1.86766	1.71841	1.73085	1.69353	8.16119	8.16119	10.1886	7.35274	8.21095	8.65871
	Fig.2 G - Circulating lactate
		HmlGal4 GFP Buff						HmlGal4 GFP Sp
	24 hpi	0.0759388	0.0860646	0.0959114	0.0718723	0.082314	0.0687524	0.0978849	0.0902629	0.08978	0.11627	0.114972	0.113066
	120 hpi	0.0986609	0.0703667	0.0914458	0.0722236	0.0811762	0.0851468	0.0720645	0.0803077	0.093081	0.101107	0.071195	0.087125
