# Supplementary material for: Drosophila macrophages switch to aerobic glycolysis to mount effective antibacterial defense
Source: eLife. 2019 Oct 14;8:e50414. doi: 10.7554/eLife.50414 (PMC6867711; doi:10.7554/eLife.50414)
Supplement: Figure 3—source data 1. [file elife-50414-fig3-data1.xlsx]

## Sheet: Sheet1
	Figure 3 - numerical data
	Fig.3 C - Expression of Ldh
		HmlGal4>Gfp Buff injected									HmlGal4>Gfp Sp infected
	24 hpi	0.959264	0.959264	0.939523	0.993092	0.993093	0.972655	1.07177	1.07177	1.04972	1.59107	1.54757	1.50525	1.72907	1.68179	1.6358	1.68179	1.6358	1.59107
	120 hpi	0.753203	0.555212	0.758442	0.76903	0.835731	0.801687	1.24066	1.19012	0.940247	1.05783	1.22358	1.14958	1.03606	1.35765	1.27554	1.24066	1.23209	1.19012
	Fig.3 D - Expression of Hif1a
		HmlGal4>Gfp Buff injected									HmlGal4>Gfp Sp infected
	24 hpi	1.45734	1.25992	1.22547	0.814131	0.703847	0.6846	1.15936	1.00231	0.974905	1.90968	2.10429	2.33486	1.33176	1.46747	1.62826	1.46747	1.61702	1.79419
	120 hpi	1.1984	0.946787	1.32052	0.973404	1.32971	0.79065	0.859227	0.824226	0.807263	1.05783	0.953372	1.26673	1.19012	1.15758	1.29335	1.24929	1.1819	1.24929
	Fig.3 E - Expression of Ldh in Hif1a RNAi
		Buff Injected																											Sp Infected
	Hml>GFP	0.843491	0.797991	0.837665	1.14428	1.06028	1.03846	1.04568	0.975656	1.12853	0.837665	0.792479	0.831878	1.25218	1.16026	1.13638	1.11299	1.03846	1.20117	0.897787	0.849358	0.891585	1.14428	1.06028	1.03846	1.03846	0.968917	1.12073	1.44838	1.49946	1.45846	1.23494	1.03846	1.12073	1.12853	1.06028	1.13638	1.31444	1.36079	1.32358	1.43838	1.20953	1.30536	1.26089	1.18464	1.26966	1.45846	1.50989	1.4686
	Hml>GFP Hif1[RNAi]	0.541279	0.897787	0.929447	0.982442	0.885427	0.989276	0.861214	0.873237	0.849358	0.584164	0.968917	1.00309	1.02416	0.923027	1.03129	0.923027	0.935912	0.910319	0.608971	1.01006	1.04568	0.989276	0.891585	0.996157	0.885426	0.897787	0.873237	0.962224	0.891585	0.765484	1.11299	1.01709	1.1053	0.962224	0.87931	0.861214	1.11299	1.03129	0.885426	1.12073	1.02416	1.11299	1.01709	0.929447	0.910319	1.03846	0.962224	0.826132
[truncated: 6 more columns]
