# Supplementary material for: Drosophila macrophages switch to aerobic glycolysis to mount effective antibacterial defense
Source: eLife. 2019 Oct 14;8:e50414. doi: 10.7554/eLife.50414 (PMC6867711; doi:10.7554/eLife.50414)
Supplement: Figure 4—figure supplement 1—source data 1. [file elife-50414-fig4-figsupp1-data1.xlsx]

## Sheet: Sheet1
	Figure 4 - Supplementary figure 1
	Fig.4 Fig.S1 A - Expression of HexA
		PBS injected																											S.p. infected
	Hml> GFP	0.0091	0.00936	0.00989	0.00904	0.00929	0.00982	0.00969	0.00996	0.01053	0.0171	0.01584	0.01389	0.01871	0.01734	0.0152	0.0171	0.01584	0.01389	0.01509	0.01389	0.01629	0.01606	0.01478	0.01734	0.01499	0.01379	0.01618	0.01951	0.01978	0.02556	0.0177	0.01795	0.0232	0.01964	0.01992	0.02574	0.01323	0.01144	0.0109	0.01541	0.01332	0.01269	0.01606	0.01389	0.01323	0.01937	0.0212	0.02418
	Hml> GFP Hif1a RNAi	0.01314	0.01305	0.01418	0.01418	0.01408	0.0153	0.01478	0.01468	0.01595	0.01252	0.01305	0.01379	0.01305	0.0136	0.01438	0.0126	0.01314	0.01389	0.0053	0.00568	0.00556	0.00568	0.00609	0.00596	0.00545	0.00584	0.00572	0.0116	0.01053	0.0116	0.01342	0.01217	0.01342	0.01252	0.01136	0.01252	0.01097	0.01606	0.0171	0.01105	0.01618	0.01722	0.01038	0.0152	0.01618	0.01488	0.01201	0.01314
	Fig.4 Fig.S1 B - Expression of Pgi
		PBS injected																											S.p. infected
	Hml> GFP	0.0547879	0.0583146	0.0518325	0.0544094	0.0579117	0.0514744	0.0583146	0.0620683	0.0551689	0.0758872	0.076415	0.0717937	0.0830429	0.08362	0.078563	0.0758872	0.076415	0.071794	0.063813	0.073812	0.07966	0.067921	0.078563	0.084788	0.063372	0.073302	0.07911	0.135842	0.15932	0.169576	0.123279	0.144586	0.153893	0.136787	0.160428	0.170755	0.118257	0.108819	0.091505	0.137738	0.126745	0.106579	0.143587	0.132127	0.111105	0.154963	0.157127	0.170755
	Hml> GFP Hif1a RNAi	0.0915054	0.0871715	0.0877778	0.0987552	0.0940779	0.0947323	0.102949	0.098073	0.0987552	0.0973956	0.0921418	0.105112	0.101532	0.096055	0.109576	0.098073	0.092783	0.105843	0.04181	0.052193	0.048027	0.044811	0.055939	0.051474	0.042986	0.05366	0.049378	0.067921	0.065154	0.070805	0.078563	0.075363	0.0819	0.073302	0.070316	0.076415	0.080772	0.08362	0.082469	0.081334	0.084202	0.083043	0.076415	0.07911	0.078021	0.071794	0.066064	0.064257
	Fig.4 Fig.S1 C - Expression of Pfk
		PBS injected																											S.p. infected
	Hml> GFP	0.00105	0.00231	0.00115	0.00104	0.00229	0.00115	0.00111	0.00246	0.00123	0.00145	0.00089	0.00067	0.00159	0.00097	0.00073	0.00145	0.00089	0.00067	0.00093	0.00079	0.00071	0.00099	0.00084	0.00075	0.00092	0.00078	0.0007	0.00239	0.00261	0.00247	0.00217	0.00237	0.00224	0.0024	0.00263	0.00249	0.0018	0.00181	0.00132	0.00209	0.00211	0.00153	0.00218	0.0022	0.0016	0.00151	0.00155	0.00161
	Hml> GFP Hif1a RNAi	0.00111	0.00069	0.00101	0.0012	0.00075	0.00109	0.00125	0.00078	0.00114	0.00137	0.00131	0.00177	0.00143	0.00136	0.00185	0.00138	0.00132	0.00178	0.00084	0.00102	0.00057	0.0009	0.00109	0.00061	0.00087	0.00105	0.00059	0.00114	0.00076	0.00071	0.00132	0.00088	0.00082	0.00123	0.00082	0.00076	0.00118	0.00164	0.00164	0.00119	0.00165	0.00165	0.00111	0.00155	0.00155	0.00153	0.00161	0.0015
	Fig.4 Fig.S1 D - Expression of Tpi
		PBS injected																											S.p. infected
	Hml> GFP	0.0575117	0.0607909	0.0547879	0.0571145	0.060371	0.0544094	0.0612138	0.0647041	0.0583146	0.0441942	0.0412346	0.0409498	0.0483614	0.045123	0.044811	0.0441942	0.041235	0.04095	0.044194	0.040667	0.046714	0.047039	0.043285	0.049721	0.043889	0.040386	0.046391	0.037163	0.042101	0.032804	0.033726	0.038208	0.02977	0.037421	0.042394	0.033032	0.040386	0.047696	0.050415	0.047039	0.055553	0.05872	0.049037	0.057912	0.061214	0.054409	0.057114	0.052556
	Hml> GFP Hif1a RNAi	0.0423939	0.0401071	0.0363979	0.0457527	0.0432847	0.0392817	0.0476956	0.0451228	0.0409498	0.0384733	0.0401071	0.0401071	0.0401071	0.04181	0.04181	0.0387409	0.040386	0.040386	0.038473	0.035649	0.038208	0.041235	0.038208	0.04095	0.039555	0.036651	0.039282	0.045123	0.032129	0.032577	0.052193	0.037163	0.037681	0.048698	0.034674	0.035158	0.037421	0.04095	0.03901	0.037681	0.041235	0.039282	0.035403	0.038741	0.036906	0.042986	0.037163	0.039555
	Fig.4 Fig.S1 E - Expression of Gapdh1
		PBS injected																											S.p. infected
	Hml> GFP	1.32869	1.29235	1.29235	1.31951	1.28343	1.28343	1.41421	1.37554	1.37554	1.19748	0.952638	0.895025	1.31039	1.04247	0.97942	1.19748	0.952638	0.895025	1.07177	1.00696	1.04972	1.14076	1.07177	1.11729	1.06437	1	1.04247	1.84038	1.81504	1.42405	1.67018	1.64718	1.29235	1.85318	1.82766	1.43396	1.85318	1.36604	1.34723	2.15846	1.59107	1.56917	2.25012	1.65864	1.6358	1.81504	1.79005	1.45397
	Hml> GFP Hif1a RNAi	0.926588	0.920188	0.926588	1	0.993093	1	1.04247	1.03527	1.04247	0.97942	0.840896	0.812252	1.02101	0.876606	0.846745	0.986233	0.846745	0.817902	1.05702	1	0.965936	1.13288	1.07177	1.03527	1.08674	1.02811	0.993092	1.91853	1.64718	1.54757	2.21914	1.90528	1.79005	2.07053	1.77768	1.67018	1.54757	1.67018	2	1.55833	1.68179	2.01391	1.46409	1.58008	1.89211	1.72907	1.7411	1.75321
	Fig.4 Fig.S1 F - Expression of Enolase
		PBS injected																											S.p. infected
	Hml> GFP	0.211686	0.241484	0.205898	0.210224	0.239816	0.204476	0.225313	0.257028	0.219151	0.210224	0.181747	0.198884	0.230047	0.198884	0.217638	0.210224	0.181747	0.198884	0.248273	0.205898	0.216134	0.264255	0.219151	0.230047	0.246558	0.204476	0.214641	0.325335	0.325335	0.271684	0.295248	0.295248	0.246558	0.327598	0.327598	0.273573	0.316439	0.316439	0.351111	0.368567	0.368567	0.408951	0.384219	0.384219	0.426317	0.293209	0.429283	0.190782
	Hml> GFP Hif1a RNAi	0.20166	0.20166	0.238159	0.217638	0.217638	0.257028	0.22688	0.22688	0.267943	0.222211	0.255253	0.238159	0.231647	0.266093	0.248273	0.223756	0.257028	0.239816	0.138696	0.136787	0.11344	0.148651	0.146604	0.121582	0.142595	0.140632	0.116629	0.204476	0.161544	0.171943	0.236514	0.186856	0.198884	0.220676	0.174343	0.185565	0.189465	0.216134	0.211686	0.190782	0.217638	0.213159	0.179244	0.204476	0.200267	0.211686	0.193446	0.205898
	Fig.4 Fig.S1 G - Expression of Hif1a
		PBS injected																											S.p. infected
	Hml> GFP	0.00085606	0.00104665	0.000874048	0.000898621	0.00109869	0.000917503	0.000815516	0.000997082	0.00083265	0.00112958	0.000850147	0.00114535	0.00102511	0.000772	0.001039	0.0013066	0.000983	0.001325	0.000601	0.000502	0.000892	0.000662	0.000553	0.000983	0.001076	0.000899	0.001597	0.002307	0.002228	0.002064	0.002291	0.002213	0.00205	0.002438	0.002355	0.002182	0.001153	0.002064	0.001848	0.001025	0.001835	0.001642	0.000937	0.001677	0.001501	0.002064	0.001797	0.002371
	Hml> GFP Hif1a RNAi	0.00110633	0.000892414	0.00121065	0.000963118	0.000776891	0.00105393	0.000798732	0.000644291	0.00087405	0.000798732	0.000631032	0.000798732	0.00127084	0.001004	0.001271	0.0007609	0.000601	0.000761	0.000788	0.000618	0.000635	0.000705	0.000553	0.000569	0.00081	0.000635	0.000653	0.000874	0.000725	0.000618	0.001245	0.001032	0.00088	0.001047	0.000868	0.00074	0.000627	0.000667	0.000705	0.000868	0.000924	0.000977	0.00081	0.000862	0.000911	0.001025	0.000997	0.000725
	Fig.4 Fig.S1 H - Expression of Ldh
		PBS injected									S.p. infected
	Hml> GFP	0.959264	0.959264	0.939523	0.993092	0.993093	0.972655	1.07177	1.07177	1.04972	1.59107	1.54757	1.50525	1.72907	1.68179	1.6358	1.68179	1.6358	1.59107
	Hml> GFP LDH RNAi	0.570382	0.578344	0.687771	0.510506	0.517633	0.615572	0.392292	0.397768	0.473029	0.721965	0.615572	0.659754	0.624165	0.532185	0.570382	0.721965	0.615572	0.659754
[truncated: 6 more columns]
