# Supplementary material for: Drosophila macrophages switch to aerobic glycolysis to mount effective antibacterial defense
Source: eLife. 2019 Oct 14;8:e50414. doi: 10.7554/eLife.50414 (PMC6867711; doi:10.7554/eLife.50414)
Supplement: Figure 4—source data 1. [file elife-50414-fig4-data1.xlsx]

## Sheet: Sheet1
	Figure 4 - numerical data
	Fig.4 D - Ldh activity
		HmlGal4 GFP SimaKK-RNAi Buff			HmlGal4 GFP SimaKK-RNAi Sp			HmlGal4 GFP KKcont Buff			HmlGal4 GFP KKcont Sp
	24 hpi	21.2935	9.08621	6.50079	23.1853	19.2479	8.90626	9.64427	11.1306	34.2182	62.1746	55.6213	57.4049
	120 hpi	14.3117	9.8698	15.2035	25.5816	7.90626	12.4917	29.6601	57.9082	15.3914	50.0723	43.0371	64.4481
	Fig.4 E -NADH basal level
		HmlGal4 GFP SimaKK-RNAi Buff			HmlGal4 GFP SimaKK-RNAi Sp			HmlGal4 GFP KKcont Buff			HmlGal4 GFP KKcont Sp
	24 hpi	1.64378	1.73085	1.73085	1.58159	1.74328	1.70597	1.75572	1.76816	1.73085	12.3465	12.8503	13.0555
	120 hpi	1.6811	1.66866	1.6811	1.65622	1.76816	1.81791	1.71841	1.73085	1.69353	7.35274	8.21095	8.65871
	Fig.4 F -Pgi activity
		HmlGal4 GFP SimaKK-RNAi Buff			HmlGal4 GFP SimaKK-RNAi Sp			HmlGal4 GFP KKcont Buff			HmlGal4 GFP KKcont Sp
	24 hpi	0.23	0.408	0.708	0.458	0.9083	0.667	0.63	0.67	0.333	2.125	2.4625	2.3438
	120 hpi	0.42	0.67	0.842	0.333	0.917	0.458	0.548	0.3958	0.813	0.558	0.583	0.517
	Fig.4 G - Ldh activity
		HmlGal4 GFP Impl3 RNAi Buff			HmlGal4 GFP Impl3 RNAi Sp			HmlGal4 GFP Trip BG Buff			HmlGal4 GFP Trip BG Sp
	24 hpi	11.8254	13.8971	2.01447	10.9327	13.0236	4.02358	11.3288	16.3823	35.0109	52.9459	40.3617	58.7089
	120 hpi	10.1136	8.61811	5.51903	11.5281	8.0327	7.62723	33.1282	7.66251	6.77071	42.3434	51.0632	53.1441
	Fig.4 H -NADH basal level
		HmlGal4 GFP Impl3 RNAi Buff			HmlGal4 GFP Impl3 RNAi Sp			HmlGal4 GFP Trip BG Buff			HmlGal4 GFP Trip BG Sp
	24 hpi	1.66866	1.71841	1.64378	5.79801	4.30547	4.36144	1.76816	1.79303	1.84279	10.7794	13.1861	12.104
	120 hpi	1.66866	1.61891	1.63134	5.64378	4.65622	6.65622	1.7806	1.83035	1.86766	8.16119	8.16119	10.1886
	Fig.4 I -Pgi activity
		HmlGal4 GFP Impl3 RNAi Buff			HmlGal4 GFP Impl3 RNAi Sp			HmlGal4 GFP Trip BG Buff			HmlGal4 GFP Trip BG Sp
	24 hpi	0.442	0.367	0.542	1.5625	1.6938	2.2813	0.308	0.45	0.458	2.3	2.4188	2.525
	120 hpi	0.225	0.35	0.35	0.458	0.383	0.67	0.5	0.408	0.458	0.583	0.5	1
