# Supplementary material for: Drosophila macrophages switch to aerobic glycolysis to mount effective antibacterial defense
Source: eLife. 2019 Oct 14;8:e50414. doi: 10.7554/eLife.50414 (PMC6867711; doi:10.7554/eLife.50414)
Supplement: Figure 5—source data 1. [file elife-50414-fig5-data1.xlsx]

## Sheet: Sheet1
	Figure 5 - numerical data
	Fig.5 A - Circulating glucose 24 hpi
	Hml>Ldh[RNAi] S.p.	Hml>Hif1[RNAi] S.p.	Hml x KK control S.p.	Hml x TRiP control S.p.	Hml>Ldh[RNAi] PBS	Hml>Hif1[RNAi] PBS	Hml x KK control PBS	Hml x TRiP control PBS
	0.1014	0.0835	0.1323	0.1401	0.0786	0.0668	0.0794	0.0672
	0.1057	0.0835	0.13	0.1338	0.0759	0.062	0.0701	0.0709
	0.1068	0.0852	0.1357	0.1508	0.067	0.0675	0.0596	0.0618
	0.1131	0.082	0.1622	0.1593	0.0609	0.0642	0.065	0.0673
	0.1127	0.0825	0.1713	0.1501	0.0686	0.0754	0.0705	0.0748
	0.1329	0.0706	0.1633	0.1904	0.0552	0.0773	0.0631	0.0626
	0.1352	0.1076	0.1821	0.188	0.0667	0.0801	0.0732	0.0826
	Fig.5 B - Glycogen stores 24 hpi
	Hml>Ldh[RNAi] S.p.	Hml>Hif1[RNAi] S.p.	Hml x KK control S.p.	Hml x TRiP control S.p.	Hml>Ldh[RNAi] PBS	Hml>Hif1[RNAi] PBS	Hml x KK control PBS	Hml x TRiP control PBS
	1.9315	2.612	1.9304	1.6349	2.1649	1.7938	2.0845	2.295
	1.2851	1.9943	1.135	1.0592	2.1692	1.572	2.0718	2.3849
	1.25	1.7468	0.7332	0.8172	1.7327	1.4305	1.9054	1.7869
	1.4708	1.5273	0.3683	0.3028	1.6647	1.2072	1.7654	2.0476
	1.2733	1.0168	0.0901	0.2179	1.8729	1.4103	1.5833	2.0436
	1.6368	1.6341	0.1484	0.188	1.3004	1.6865	1.5328	1.4875
	0.7097	0.9325	0.5609	0.1582	1.7525	1.5355	1.5509	1.4485
	Fig.5 C - Circulating lactate 24 hpi
	Hml>Ldh[RNAi] S.p.	Hml>Hif1[RNAi] S.p.	Hml x KK control S.p.	Hml x TRiP control S.p.	Hml>Ldh[RNAi] PBS	Hml>Hif1[RNAi] PBS	Hml x KK control PBS	Hml x TRiP control PBS
	0.0602344	0.086014	0.140408	0.166506	0.0845585	0.0842487	0.133904	0.100587
	0.0509859	0.0847068	0.130521	0.143088	0.105151	0.15183	0.121111	0.10039
	0.0608817	0.108143	0.15675	0.104379	0.0807541	0.156378	0.0844675	0.0939835
	0.0783047	0.12974	0.154077	0.115358	0.0692428	0.1205	0.0658819	0.0785636
	0.0760154	0.112942	0.129521	0.178225	0.0918105	0.0564008	0.0900708	0.104602
	0.05945	0.0824212	0.120073	0.136517	0.0847723	0.0852582	0.0848888	0.0888008
	0.0377861	0.0732545	0.11803	0.135196	0.108665	0.115624	0.101174	0.0719294
