# Supplementary material for: Drosophila macrophages switch to aerobic glycolysis to mount effective antibacterial defense
Source: eLife. 2019 Oct 14;8:e50414. doi: 10.7554/eLife.50414 (PMC6867711; doi:10.7554/eLife.50414)
Supplement: Figure 6—source data 1. [file elife-50414-fig6-data1.xlsx]

## Sheet: Sheet1
	Figure 6 - numerical data
	Fig.6 A - Survival of Sp infection Hif1a RNAi
	Survival data on extra sheet "Hif1a RNAi survival"
	Fig.6 B - Survival of Sp infection Ldh RNAi
	Survival data on extra sheet "Ldh RNAi survival"
	Fig.6 C - Pathogen load of Sp Hif1a RNAi
		Hml G4G80 SimaRNAi KK																																				Hml G4G80 KK control
	0	21	25	17	17	18	19	22	23	21	20	18	18	20	17	22	23	22	22	22	20	18	18	18	17	17	19	22	23	19	21	22	24	21	23	23	20	23	20	19	19	21	22	23	20	18	18	21	21
	24	137	154	181	243	406	321	294	24	138	99	117	141	97	137	283	85	283	33	118	138	39	77	79	243	274	391	141	359	217	113	100	46	317	141	254	52	62	33	152	164	221	145	109	89	88	68	187	122
	48	268	324	349	267	291	301	234	267	220	128	176	197	129	120	230	219	363	172	147	111	255	185	131	433	318	371	389	264	271	239	220	154	128	141	232	364	134	145		257	221	209	234		167	187	154	177
	72	43	122	146	103	339	76	111	185	181	337	355	224	219	174	344	235	530	191	230	322	232	264	174	395	112	86	91	116	255	221	417	239	244	338	149	57	122	154	166	165		189	87	122	176	133	109
	Fig.6 D - Pathogen load of Sp Ldh RNAi
		HmlG4G80 Impl3 RNAi																																				Impl3 RNAi x W
	0	22	20	20	19	19	21	23	21	22	22	20	18	18	22	2	23	17	17	18	19	19	16	22	23	18	18	19	20	20	18	22	22					20	21	21	20	18	18	22	23	22	18	18	19
	24	255	274	55	103	178	149	164	189	82	258	232	120	192	134	232	96	217	159	183	145	180	83	87	167	13	96	131	134	160	132	241	111					84	12		115	116	124	134	156	178	87	54	109
	48	102	147	296	257	291	379	190	260	174	257	276	325	410	499	136	226	426	420	305	124	244	68	96	155	121	190	244	232	372	410	131	242					55	99	150	180	190		280	310	260	259	201
	72	108	360	339	405	233	557	81	120	183	238	160	319	396	140	79	357	0	251	195	236	263	358	503	134	186	129	439	278	421	106	237	355					89	114	77		264	228	221			228	221	311
[truncated: 24 more columns]

## Sheet: Hif1a RNAi survival
Days	HmlG4G80 Sima RNAi KK, Sp	Hml G4G80 GFP RNAi, Sp
1	1
1	1
1	1
1	1
1	1
1	1
1	1
1	1
1	1
1	1
1	1
1	1
1	1
1	1
1	1
1	1
1	1
1	1
1	1
1	1
1	1
1	1
1	1
1	1
1	1
1	1
1	1
1	1
1	1
1	1
1	1
1	1
1	1
1	1
1	1
1	1
1	1
1	1
1	1
1	1
1	1
1	1
1	1
1	1
1	1
1	1
1	1
1	1
2	1	1
2	1
2	1
2	1
2	1
2	1
2	1
2	1
2	1
2	1
2	1
2	1
2	1
2	1
2	1
2	1
2	1
2	1
2	1
2	1
2	1
2	1
2	1
2	1
2	1
2	1
2	1
2	1
2	1
2	1
2	1
2	1
2	1
2	1
2	1
2	1
2	1
2	1
2	1
2	1
2	1
2	1
2	1
2	1
2	1
2	1
2	1
2	1
2	1
2	1
2	1
2	1
2	1
2	1
2	1
2	1
2	1
2	1
2	1
2	1
2	1
2	1
2	1
2	1
2
2
2
2
2
2
3	1	1
3	1	1
3	1	1
3	1	1
3	1	1
3	1	1
3	1	1
3	1	1
3	1	1
3	1	1
3	1	1
3	1	1
3	1	1
3	1	1
3	1	1
3	1	1
3	1	1
3	1	1
3	1	1
3	1	1
3	1	1
3	1	1
3	1	1
3	1	1
3	1	1
3	1	1
3	1	1
3	1	1
3	1	1
3	1	1
3	1	1
3	1	1
3	1	1
3	1	1
3	1	1
3	1	1
3	1	1
3	1	1
3	1	1
3	1
3	1
3	1
3	1
3	1
3	1
3	1
3	1
3	1
3	1
3	1
3	1
3	1
3	1
3	1
3	1
3	1
3	1
3	1
3	1
3	1
3	1
3	1
3	1
3	1
3	1
3	1
3	1
3	1
3	1
3	1
3	1
3	1
3	1
3	1
3	1
3	1
3	1
3	1
3	1
3	1
3	1
3	1
3	1
3	1
3
4	1	1
4	1	1
4	1	1
4	1	1
4	1	1
4	1	1
4	1	1
4	1	1
4	1	1
4	1	1
4	1	1
4	1	1
4	1	1
4	1	1
4	1	1
4	1	1
4	1	1
4	1	1
4	1	1
4	1	1
4	1	1
4	1	1
4	1	1
4	1	1
4	1	1
4	1	1
4	1	1
4	1	1
4	1	1
4	1	1
4	1	1
4	1	1
4	1	1
4	1	1
4	1	1
4	1	1
4	1	1
4	1	1
4	1	1
4	1	1
4	1	1
4	1	1
4	1	1
4	1	1
4	1	1
4	1	1
4	1	1
4	1	1
4	1	1
4	1	1
4	1	1
4	1	1
4	1	1
4	1	1
4		1
4		1
4		1
4		1
4		1
4		1
4		1
4		1
4		1
4		1
4		1
4
4
4
4
4
4
4
4
4
4
4
4
4
4
4
4
4
4
4
4
4
4
4
4
4
4
4
4
4
4
4
4
4
4
4
4
4
4
4
4
4
4
4
4
5	1	1
5	1	1
5	1	1
5	1	1
5	1	1
5	1	1
5	1	1
5	1	1
5	1	1
5	1	1
5	1	1
5	1	1
5	1	1
5	1	1
5	1	1
5	1	1
5	1	1
5	1	1
5	1	1
5	1	1
5	1	1
5	1	1
5	1	1
5	1	1
5	1	1
5	1	1
5	1	1
5	1	1
5	1	1
5	1	1
5	1	1
5	1	1
5	1	1
5	1	1
5	1	1
5	1	1
5	1	1
5		1
5		1
5		1
5		1
5		1
5		1
5		1
5		1
5		1
5		1
5		1
5		1
5		1
5		1
5		1
5		1
5		1
5		1
5		1
5
5
5
5
5
5
5
5
5
5
5
5
5
5
5
5
5
5
5
6	1
6	1
6	1
6	1
6	1
6	1
6	1
6	1
6	1
6	1
6	1
6	1
6	1
6	1
6	1
6	1
6	1
6	1
6	1
6	1
6	1
6	1
6	1
6	1
6	1
6	1
6	1
6
6
6
6
6
6
6
6
6
6
6
6
6
6
6
6
6
6
6
6
6
6
6
7	1	1
7	1
7	1
7
8	1
8	1
8	1
8	1
8	1
8	1
8	1
8	1
8	1
8	1
8	1
8	1
8	1
8	1
8
8
8
8
8
8
8
8
8
8
8
8
8
8
8
8
9	1	1
9	1	1
9	1	1
9	1	1
9	1	1
9	1	1
9	1	1
9	1	1
9	1	1
9	1	1
9	1	1
9	1	1
9	1	1
9	1	1
9	1	1
9	1	1
9	1	1
9	1	1
9	1
9	1
9	1
9	1
9	1
9	1
9	1
9	1
9	1
9	1
9	1
9	1
9	1
9	1
9	1
9	1
9	1
9	1
9	1
9	1
9	1
9	1
9	1
9	1
9	1
9	1
9	1
9	1
9	1
9	1
9	1
9	1
9	1
9	1
9	1
9	1
9	1
9	1
9	1
9	1
9	1
9	1
9	1
9	1
9	1
9	1
9	1
9	1
9	1
9	1
9	1
9	1
9	1
9	1
9	1
9	1
9	1
9	1
9	1
9	1
9	1
9	1
9	1
9	1
9	1
9	1
9	1
9	1
9	1
9	1
9	1
9	1
9	1
9	1
9	1
9	1
9	1
9	1
9	1
9	1
9	1
9	1
9	1
9	1
9	1
9	1
9	1
9	1
9	1
9	1
9	1
9	1
9	1
9	1
9	1
9	1
9	1
9	1
9	1
9	1
9	1
9	1
9	1
9	1
9	1
9	1
9	1
9	1
9	1
9	1
9	1
9	1
9	1
9	1
9	1
9	1
9	1
9	1
9	1
9	1
9	1
9	1
9	1
9	1
9	1
9	1
9	1
9	1
9	1
9	1
9	1
9	1
9	1
9	1
9	1
9	1
9	1
9	1
9	1
9	1
9	1
9	1
9	1
9	1
9	1
9	1
9	1
9	1
9	1
9	1
9	1
9	1
9	1
9	1
9	1
9	1
9	1
9	1
9	1
9	1
9	1
9	1
9	1
9	1
9	1
9	1
9	1
9	1
9	1
9	1
9	1
9	1
9	1
9	1
9	1
9	1
9	1
9	1
9	1
9	1
9	1
9	1
9	1
9	1
9	1
9	1
9	1
9	1
9	1
9	1
10	1	1
10
10
10
10
11	1	1
11	1	1
11	1	1
11	1	1
11	1	1
11	1	1
11	1	1
11	1	1
11	1	1
11		1
11		1
11		1
11		1
11		1
11		1
11		1
11		1
11		1
11		1
11		1
11		1
11		1
11		1
11		1
11		1
11		1
11
11
11
11
11
11
11
11
11
11
11
11
11
12	1	1
12	1	1
12	1	1
12	1	1
12	1	1
12	1	1
12	1	1
12	1	1
12	1	1
12	1	1
12	1	1
12	1	1
12	1	1
12	1	1
12	1
12	1
12	1
12	1
12	1
12	1
12	1
12	1
12	1
12
12
12
12
12
12
12
12
12
12
12
12
12
13	1
13
13
13
13
14	1	1
14	1
14	1
14
14
14
14
14
14
14
14
14
14
14
14
14
14
14
14
14
14
15
15
15
15
15
15
15
15
15
15
15
15
15
15
15
15
15
15
15
15
15
15
15
15
15
15
15
15
15
15
15
15
15
15
15
15
15
15
15
15
15
15
15
15
15
15
15
15
15
15
15
15
15
15
15
15
15
15
15
15
15
15
15
15
15
15
15
15
15
15
15
15
15
15
15
15
15
15
15
15
15
15
15
15
15
15
15
16	1	1
16	1
16
16
16
16
16
16
16
16
16
16
16
16
16
16
16
16
16
17	1	1
17		1
17		1
17
17
17
17
17
17
17
17
17
17
17
17
17
17
17
17
17
17
18	1	1
18		1
18		1
18
18
18
18
18
18
18
18
18
18
18
18
18
18
18
18
18
18
18
18
18
18
18
18
19		1
19		1
19		1
19		1
19		1
19
19
19
19
19
19
19
19
19
19
19
20	1	1
20	1	1
20	1	1
20	1	1
20	1	1
20	1	1
20	1	1
20	1	1
20	1	1
20	1	1
20	1	1
20	1	1
20	1	1
20	1	1
20	1	1
20	1	1
20	1	1
20		1
20		1
20		1
20		1
20		1
20		1
20
20
20
20
20
20
20
20
20
20
20
20
20
20
20
20
20
20
20
20
20
20
20
20
20
20
20
20
20
20
20
20
20
20
20
20
20
20
20
20
20
20
20
20
20
20
20
20
20
20
20
20
20
20
20
21	1	1
21	1	1
21
21
21
21
21
21
21
21
21
21
21
21
21
21
21
21
21
21
21
21
21
21
21
21
21
21
21
21
21
21
21
21
21
21
21
21
21
21
21
21
21
21
21
21
21
21
21
21
21
21
21
21
21
21
21
21
21
21
21
21
21
21
21
21
21
21
21
21
22	1	1
22	1	1
22	1	1
22	1	1
22	1	1
22	1	1
22	1	1
22		1
22		1
22		1
22		1
22
22
22
22
22
22
22
22
22
22
22
22
22
22
22
22
22
22
22
22
22
22
22
22
22
22
22
22
22
22
22
22
22
23	1	1
23	1	1
23		1
23		1
23		1
23		1
23		1
23		1
23		1
23		1
23		1
23		1
23		1
23		1
23		1
23		1
23		1
23
23
23	0	0
23	0	0
23	0	0
23	0	0
23	0	0
23	0	0
23	0	0
23	0	0
23	0	0
23	0	0
23	0	0
23	0	0
23	0	0
23	0	0
23	0	0
23	0	0
23	0	0
23	0	0
23	0	0
23	0	0
23	0	0
23	0	0
23	0	0
23	0	0
23	0	0
23	0	0
23	0	0
23	0	0
23	0	0
23	0	0
23	0	0
23	0	0
23	0	0
23	0	0
23	0	0
23	0	0
23	0	0
23	0	0
23	0	0
23	0	0
23	0	0
23	0	0
23	0	0
23	0	0
23		0
23		0
23		0
23		0
23		0
23		0
23		0
23		0
23		0
23		0
23		0
23		0
23		0
23		0
23		0
23		0
23		0
23		0
23		0
23		0
23		0
23		0
23		0
23		0
23		0
23		0
23		0
23		0
23		0
23		0
23		0
23		0
23		0
23		0
23		0
23		0
23		0
23		0
23		0
23		0
23		0
23		0
23		0
23		0
23		0
23		0
23		0
23		0
23		0
23		0
23		0
23		0
23		0
23		0
23		0
23		0
23		0
23		0
23		0
23		0
23		0
23		0
23		0
23		0
23		0
23		0
23		0
23		0
23		0
23		0
23		0
23		0
23		0
23		0
23		0
23		0
23		0
23		0
23		0
23		0
23		0
23		0
23		0
23		0
23		0
23		0
23		0
23		0
23		0
23		0
23		0
23		0
23		0
23		0
23		0
23		0
23		0
23		0
23		0
23		0
23		0
23		0
23		0
23		0
23		0
23		0
23		0
23		0
23		0
23		0
23		0
23		0
23		0
23		0
23		0
23		0
23		0
23		0
23		0
23		0
23		0
23		0
23		0
23		0
23		0
23		0
23		0
23		0
23		0
23		0
23		0
23		0
23		0
23		0
23		0
23		0
23		0
23		0
23		0
23		0
23		0
23		0
23		0
23		0
23		0
23		0
23		0
23		0
23		0
23		0
23		0
23		0
23		0
23		0
23		0
23		0
23		0
23		0
23		0
23		0
23		0
23		0
23		0
23		0
23		0
23		0
23		0
23		0
23		0
23		0
23		0
23		0
23		0
23		0
23		0
23		0
23		0
23		0
23		0
23		0
23		0
23		0
23		0
23		0
23		0
23		0
23		0
23		0
23		0
23		0
23		0
23		0
23		0
23		0
23		0
23		0
23		0
23		0
23		0
23		0
23		0
23		0
23		0
23		0
23		0
23		0
23		0
23		0
23		0
23		0
23		0
23		0
23		0
23		0
23		0
23		0
23		0
23		0
23		0
23		0
23		0
23		0
23		0
23		0
23		0
23		0
23		0
23		0
23		0
23		0
23		0
23		0
23		0
23		0
23		0
23		0
23		0
23		0
23		0
23		0
23		0
23		0
23		0
23		0
23		0
23		0
23		0
23		0
23		0
23		0
23		0
		0
		0
		0

## Sheet: Ldh RNAi survival
	HmlGal4 TubGal80TS w	HmlGal4TubGal80TS x Impl3 RNAi
1	1	1
1	1	1
1	1	1
1	1	1
1	1	1
1	1	1
1	1	1
1	1	1
1	1	1
1	1	1
1		1
1		1
1		1
1		1
1		1
1		1
1		1
1		1
2	1	1
2		1
2		1
2		1
2		1
2		1
2		1
2		1
2		1
2		1
2		1
2		1
2		1
2		1
2
2
2
2
2
2
2
2
3	1	1
3	1	1
3	1	1
3	1	1
3	1	1
3	1	1
3	1	1
3	1	1
3		1
3		1
3		1
3		1
3		1
3		1
3		1
3		1
3		1
3		1
3		1
4	1	1
4	1	1
4		1
4		1
4		1
4		1
4		1
4		1
4		1
4		1
4		1
4		1
4		1
4		1
4		1
4		1
4		1
4		1
4		1
4		1
4		1
4		1
4		1
4		1
4		1
4		1
4		1
4		1
4
4
4
4
4
4
4
4
4
4
4
4
5	1	1
5	1	1
5	1	1
5	1	1
5	1	1
5	1	1
5	1	1
5	1	1
5	1	1
5	1	1
5		1
5		1
5		1
5		1
5		1
5		1
5		1
5		1
5		1
5		1
5		1
5		1
5		1
5		1
5		1
5		1
5		1
5		1
5		1
5		1
5
5
5
5
5
5
5
5
5
5
5
6	1	1
6	1	1
6	1	1
6	1	1
6	1	1
6	1	1
6	1	1
6	1	1
6		1
6		1
6		1
6		1
6		1
6		1
6		1
6		1
6		1
6		1
6		1
6		1
6		1
6		1
6		1
6		1
6		1
6		1
6		1
6		1
6		1
6		1
6		1
6		1
6		1
6		1
6		1
6		1
6		1
6		1
6		1
6		1
6		1
6		1
6		1
6		1
6		1
6		1
6		1
6		1
6
6
6
6
7	1	1
7	1	1
7	1	1
7	1	1
7	1	1
7	1	1
7	1	1
7		1
7		1
7		1
7		1
7		1
7		1
7		1
7		1
7		1
7		1
7		1
7		1
7		1
7		1
7		1
7		1
7		1
7		1
7		1
7		1
7		1
7		1
7		1
7		1
7		1
7		1
7		1
7
7
7
7
7
7
8	1	1
8	1	1
8	1	1
8	1	1
8	1	1
8	1	1
8	1	1
8	1	1
8	1	1
8		1
8		1
8		1
8		1
8		1
8		1
8		1
8		1
8		1
8		1
8		1
8		1
8		1
8
8
8
8
8
8
8
8
8
8
8
8
8
8
8
8
8
8
8
8
8
8
8
9	1	1
9	1	1
9	1	1
9	1	1
9	1	1
9	1	1
9	1	1
9	1	1
9		1
9		1
9		1
9		1
9		1
9		1
9		1
9		1
9		1
9		1
9		1
9		1
9		1
9		1
9		1
9		1
9		1
9		1
9		1
9		1
9		1
9		1
9		1
9		1
9		1
9		1
9		1
9		1
9		1
9		1
9		1
9		1
9		1
9		1
9		1
9		1
9		1
9		1
9		1
9		1
9		1
10	1	1
10	1	1
10	1	1
10	1	1
10	1	1
10	1	1
10	1	1
10	1	1
10	1	1
10	1	1
10	1	1
10	1	1
10	1	1
10	1	1
10		1
10		1
10		1
10		1
10		1
10		1
10		1
10		1
10		1
10		1
10		1
10		1
10		1
10		1
10		1
10		1
10		1
10		1
10		1
10		1
10		1
10		1
10		1
10		1
10		1
10		1
10		1
10		1
10		1
10		1
10		1
10		1
10		1
10		1
10		1
10		1
11	1	1
11	1	1
11	1	1
11	1	1
11	1	1
11	1	1
11	1	1
11	1	1
11		1
11		1
11		1
11		1
11		1
11		1
11		1
11		1
11		1
11		1
11		1
11		1
11		1
11		1
11		1
11		1
11		1
11		1
11		1
11		1
11		1
11		1
11		1
11		1
11		1
11		1
11		1
11		1
11		1
11		1
12	1	1
12	1	1
12	1	1
12	1	1
12	1	1
12	1	1
12	1	1
12	1	1
12	1	1
12	1	1
12	1	1
12	1	1
12		1
12		1
12		1
12		1
12		1
12		1
12		1
12		1
12		1
12		1
12		1
12		1
12		1
12		1
12		1
12		1
12		1
12		1
12		1
12		1
12		1
12		1
13	1	1
13	1	1
13	1	1
13	1	1
13	1	1
13	1	1
13	1	1
13	1	1
13	1	1
13	1	1
13	1	1
13	1	1
13	1	1
13		1
13		1
13		1
13
13
13
13
13
13
13
13
13
13
13
13
13
14	1	1
14	1	1
14	1	1
14	1	1
14	1	1
14	1	1
14	1
14	1
14	1
14	1
14	1
14	1
14	1
14	1
14	1
14	1
14	1
14	1
14
14
14
14
14
14
14
14
14
14
14
14
14
14
14
15	1	1
15	1	1
15	1	1
15	1
15	1
15	1
15	1
15	1
15	1
15	1
15	1
15	1
15	1
15	1
15	1
15	1
15	1
15	1
15	1
15	1
15	1
15	1
15
15
15
15
15
15
15
15
15
15
15
15
15
15
15
15
15
15
15
15
15
15
15
15
15
15
15
15
15
15
16	1	1
16	1	1
16	1
16	1
16	1
16	1
16	1
16	1
16	1
16	1
16	1
16	1
16	1
16	1
16	1
16	1
16	1
16	1
16	1
16	1
16	1
16	1
16	1
16	1
16
16
16
16
16
16
16
16
16
16
16
16
16
16
16
16
16
16
16
16
16
16
17	1
17	1
17	1
17	1
17	1
17	1
17	1
17	1
17	1
17	1
17	1
17	1
17	1
17	1
17	1
17	1
17	1
17	1
17	1
17	1
17	1
17	1
17	1
17	1
17	1
17	1
17	1
17	1
17	1
17	1
17	1
17	1
17	1
17	1
17	1
17	1
17	1
17	1
17	1
18	1
18	1
18	1
18	1
18	1
18	1
18	1
18	1
18	1
18	1
18	1
18	1
18	1
18	1
18	1
18	1
18	1
18	1
18	1
18	1
18	1
18	1
18	1
18
18
18
19	1
19	1
19	1
19	1
19	1
19	1
19	1
19	1
19	1
19	1
19	1
19	1
19	1
19	1
19	1
19	1
19	1
19	1
19	1
19	1
19	1
19	1
19	1
19	1
19	1
19	1
20	1
20	1
20	1
20	1
20	1
20	1
20	1
20	1
20	1
20	1
20	1
20
20
20
20
20
20
20
20
20
20
20
20
20
20
20
20
20
20
20
20
21	1
21	1
21	1
21	1
21	1
21	1
21	1
21	1
21	1
21	1
21	1
21	1
21	1
21	1
21	1
21	1
21	1
21	1
21
21
21
21
21
22	1
22	1
22	1
22	1
22	1
22	1
22	1
22	1
22	1
22	1
22	1
22	1
22	1
22
22
22
22
22
22
22
22
22
22
22
22
22
22
22
22
22
22
22
22
22
22
22
22
22
22
22
22
23	1
23	1
23	1
23	1
23	1
23	1
23	1
23	1
24	1
24	1
24	1
24	1
24	1
24	1
24	1
24
24
24
25	1
25	1
25	1
25	1
25	1
25	1
25	1
25	1
25	1
25	1
25	0	0
25	0	0
25	0	0
25	0	0
25	0	0
25	0	0
25	0	0
25	0	0
25	0	0
25	0	0
25	0	0
25	0	0
25	0	0
25	0	0
25	0	0
25	0	0
25	0	0
25	0	0
25	0	0
25	0
25	0
25	0
25	0
25	0
25	0
25	0
25	0
25	0
25	0
25	0
25	0
25	0
25	0
25	0
25	0
25	0
25	0
25	0
25	0
25	0
25	0
25	0
25	0
25	0
25	0
25	0
25	0
25	0
25	0
25	0
25	0
25	0
25	0
25	0
25	0
25	0
25	0
25	0
25	0
25	0
25	0
25	0
25	0
25	0
25	0
25	0
25	0
25	0
25	0
25	0
25	0
25	0
25	0
25	0
25	0
25	0
25	0
25	0
25	0
25	0
25	0
25	0
25	0
25	0
25	0
25	0
25	0
25	0
25	0
25	0
25	0
25	0
25	0
