# Supplementary figures and images for: Drosophila macrophages switch to aerobic glycolysis to mount effective antibacterial defense
Source: eLife journal article supplement (doi:10.7554/elife.50414), 2019-10-14

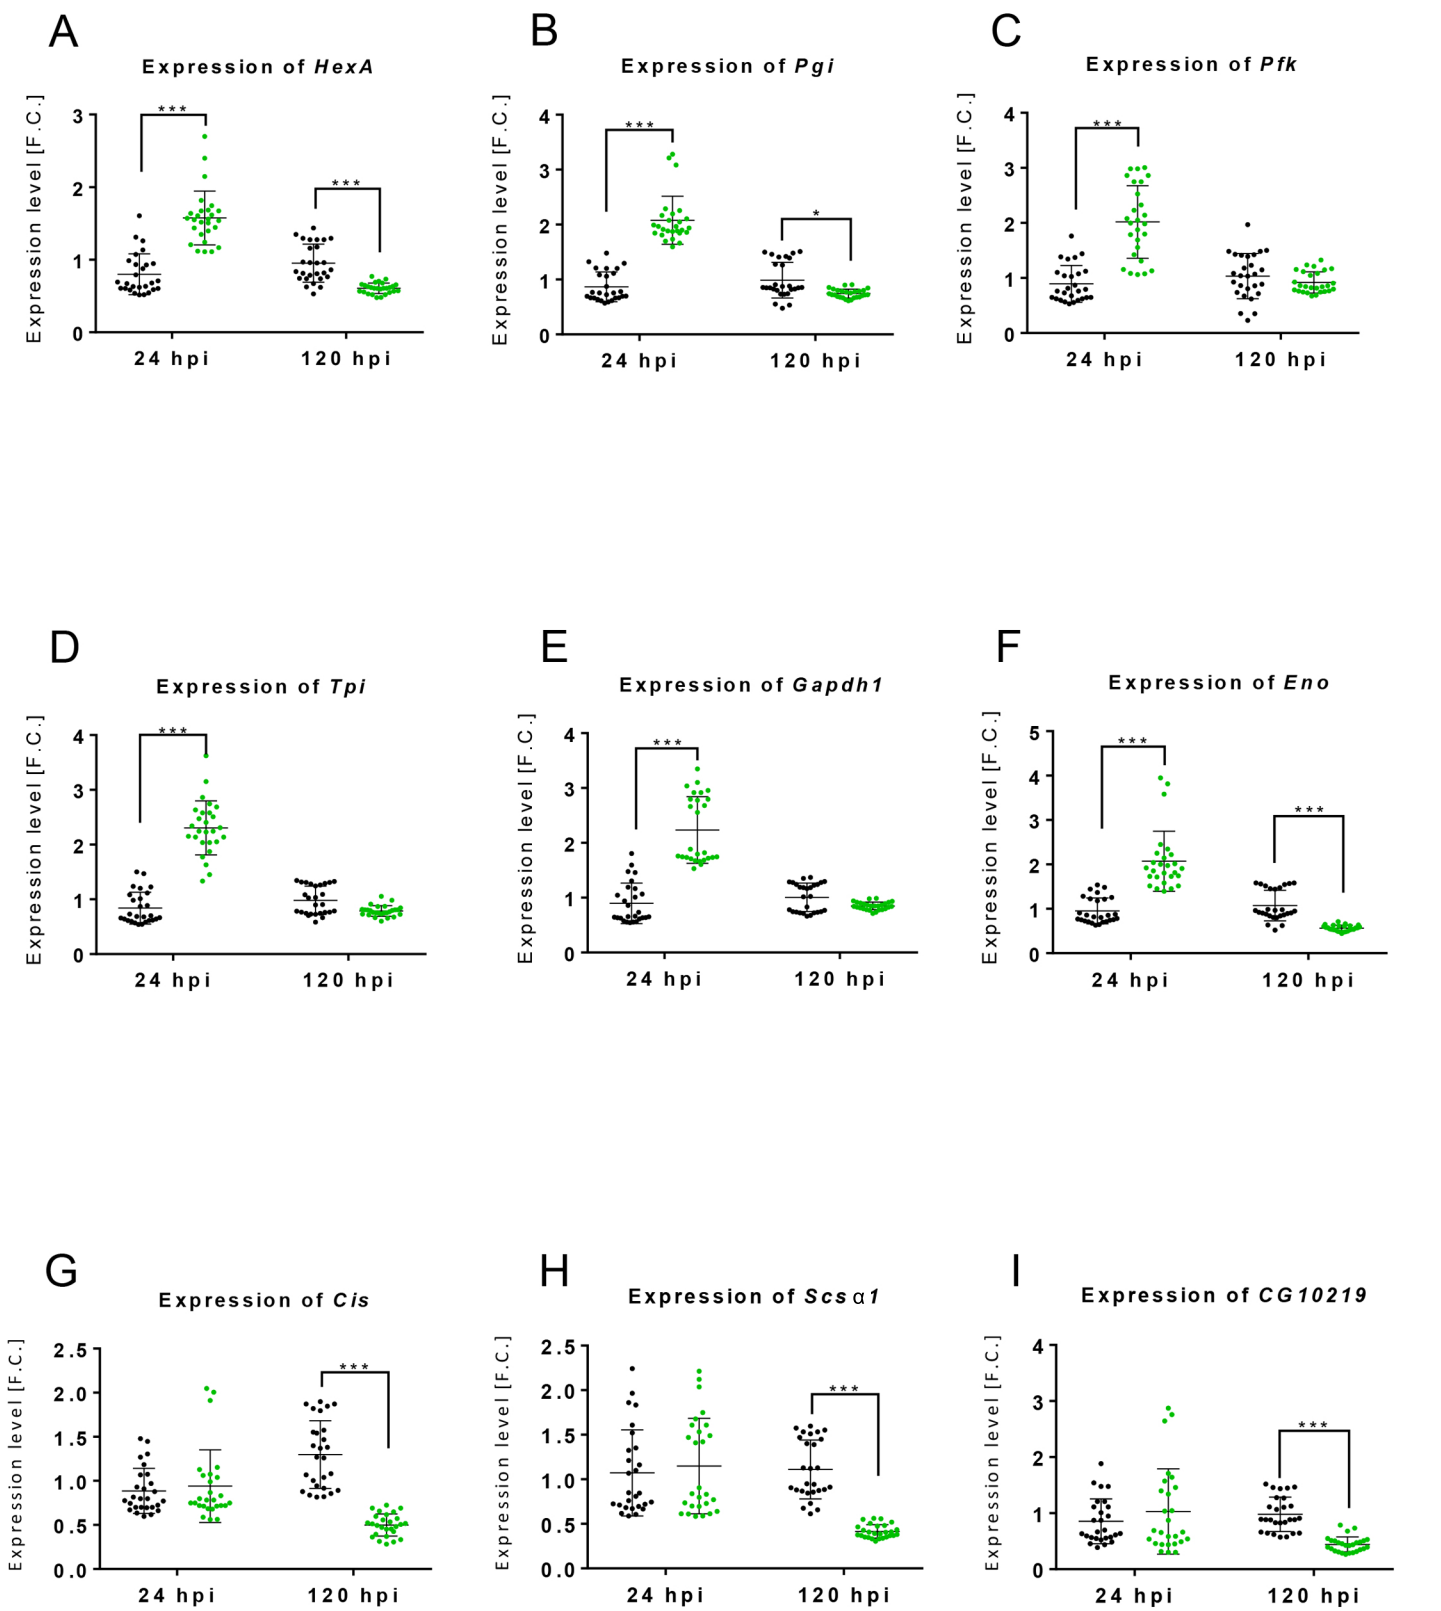

- *HmI>GFP* PBS
- *HmI>GFP* S.p.

Supplement: supp [file elife_poa_e50414_Figure_2_figure_supplement_1.pdf › elife_poa_e50414_Figure_2_figure_supplement_1.pdf]

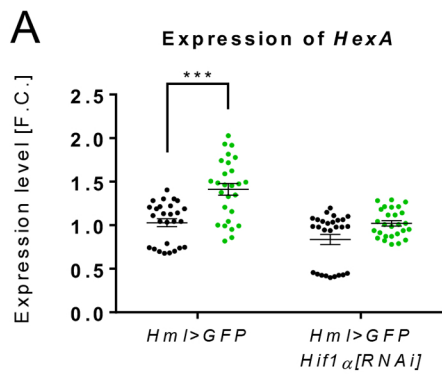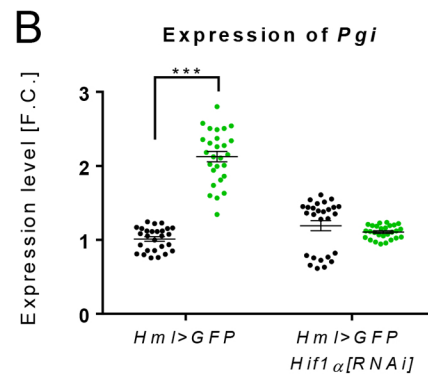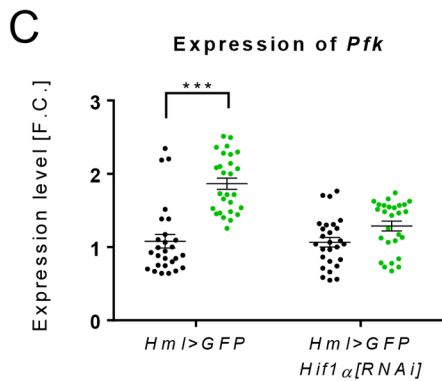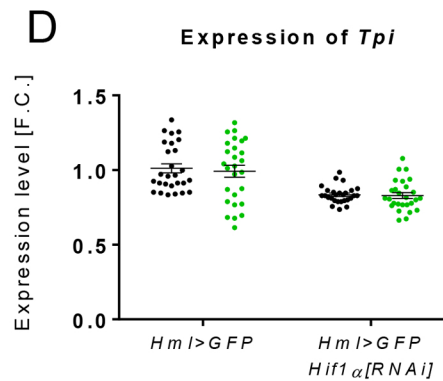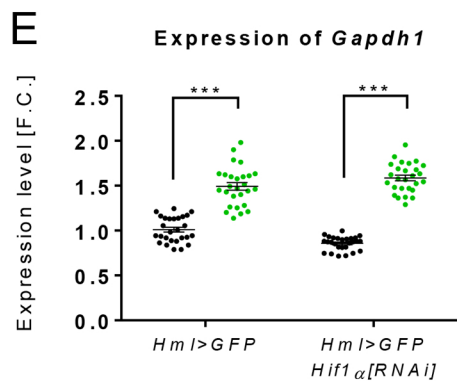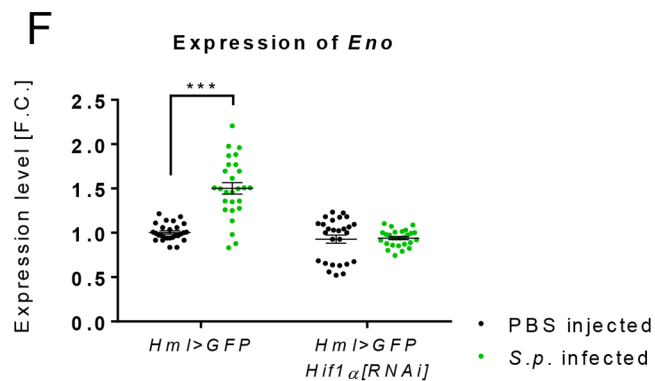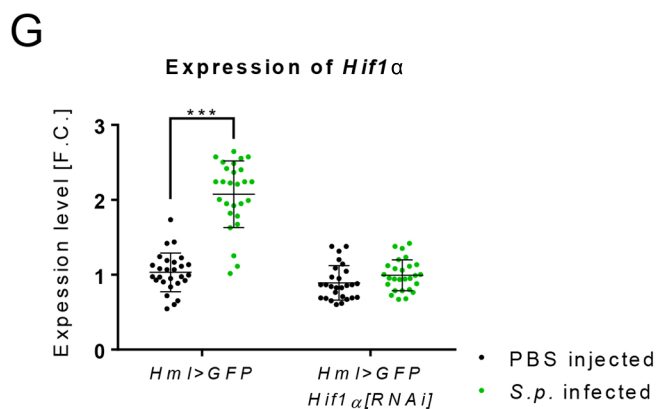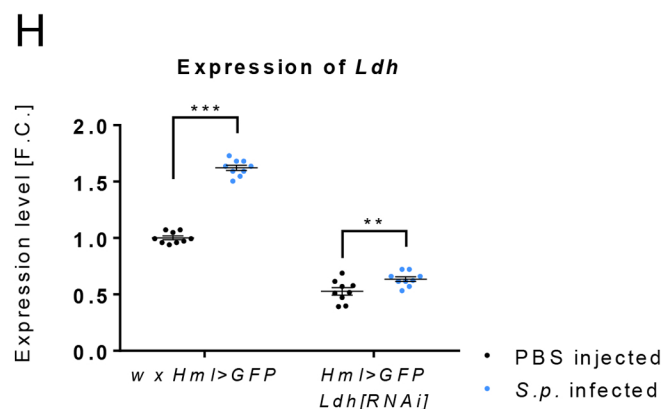

Supplement: supp [file elife_poa_e50414_Figure_4_figure_supplement_1.pdf › elife_poa_e50414_Figure_4_figure_supplement_1.pdf]
